1 **Manuscript title:** Gastric administration of *Cis-9, trans-11* and *trans-10, cis-12* conjugated  
2 linoleic during the pregestational and gestational periods does not influence the follicular  
3 endowment of the progeny

4

5 **Short title:** Effects of conjugated linoleic acid supplementation on fetal programming in mice

6

7 **Author names and affiliations:** Danielle Storino de Freitas<sup>1</sup>, Guilherme Antonio de Gouvêa  
8 Lopes<sup>1</sup>, Barbara Rodrigues Nascimento<sup>1</sup>, Ana Paula Madureira<sup>1</sup>, Paulo Henrique Almeida  
9 Campos-Junior<sup>1\*</sup> (<https://orcid.org/0000-0003-2400-2548>)

10 <sup>a</sup>Laboratório de Pesquisa em Reprodução e Desenvolvimento, Universidade Federal de São  
11 João del Rei. São João del-Rei, Minas Gerais, Brazil.

12 **Email address:** danielestorino@hotmail.com, guilhermegouveaa@outlook.com,  
13 bnrodrigues08@gmail.com, apmadureira@ufsj.edu.br, paulohenrique@ufsj.edu.br

14

15 \* Correspondence should be addressed to:

16 paulohenrique@ufsj.edu.br Universidade Federal de São João del Rei. Praça Dom Helvécio, 74  
17 - Dom Bosco, São João del-Rei, MG, 36301-160, Brazil

18

19

20

21

22

23

24

25

26

## 27 **Abstract**

28 Fetal programming suggests that maternal stimulation and nutrition during the period of fetal  
29 development can program the progeny. Conjugated linoleic acid (CLA), an isomer of linoleic  
30 acid, has been characterized in several aspects, but few studies have been performed on its  
31 involvement in reproduction and fetal programming. The aim of this study was to evaluate the  
32 F1, F2 and F3 progeny of female mice supplemented with CLA during the pregestational and  
33 gestational periods with respect to biometric and reproductive parameters, as well as ovarian  
34 morphophysiology. The F1 progeny of mothers supplemented with CLA exhibited stable  
35 weight gain, while the F2 progeny showed no effects ( $P=0.0187$  and  $P=0.0245$ , respectively).  
36 A reduction in Lee's Index was observed in both generations at the second post-weaning  
37 evaluation week in the animals treated with CLA ( $P=0.0100$  and  $P=0.0078$ , respectively). The  
38 F2 generation showed an increase in the anogenital index in both sexes of the animals treated  
39 with CLA ( $P= 0.0114$  and  $P<0.0001$ , female and male respectively). CLA administration to  
40 mothers did not affect any of the following in their progeny: ovarian follicle mobilization  
41 ( $P>0.05$ ), follicle number ( $P>0.05$ ) and the integrated density of the lipid content of oocytes  
42 included in antral follicles ( $P>0.05$ ). This study evaluated the use of CLA in mothers and found  
43 that it did not affect the progeny regarding murine reproductive performance, suggesting that  
44 this supplement can be used safely.

45 **Keywords:** Fertility; Fetal programming; Folliculogenesis; Nutrition; CLA

46

## 47 **Introduction**

48 Historically, studies have been conducted to understand how maternal nutrition influences the  
49 development and offspring health [1]. The concept of fetal programming suggests that maternal  
50 stimulation and nutrition during the period of fetal development can program the progeny into  
51 adulthood [2,3].

52 Nutritional demands and their effects are considered individual, as is the response of offspring  
53 to maternal nutrition factors. The effects of maternal nutrition during pregnancy on the  
54 offspring's health may be more apparent during the perinatal period [4]. The fetus adaptation to  
55 the morphological, physiological and molecular pressures submitted during the embryonic  
56 development are made possible by epigenetics [5], characterized by molecular factors or  
57 processes around DNA that have the ability to regulate genomic activity independently of the  
58 DNA sequence and are both mitotically stable and heritable through the germ line [6].  
59 Some genes can remain imprinted in specific tissues of the organism throughout life [7],  
60 however, with DNA methylation, the changes can be transmitted transgenerationally [8]. Thus,  
61 these processes are extremely important in the regulation of genomic activity [9] in animals  
62 exposed to numerous factors during gestational development. Conjugated linoleic acid (CLA)  
63 refers to a mixture of positional and geometric isomers of linoleic acid with conjugated double  
64 bonds, not separated by a methylene group as in linoleic acid. These isomers can be synthesized  
65 in the rumen, adipose tissue and ruminant mammary gland, a process known as endogenous  
66 synthesis. CLA is widely used as a food supplement, due to its ability to maximize the use of  
67 body fat reserves, reduce carcinogenesis, exert an obesity effect, and alter the lipid composition  
68 of bovine milk [10]. The supplementation of diets and culture media with CLA is an emerging  
69 area of research, and studies are needed to elucidate its beneficial effects on reproductive  
70 parameters. Recently, we demonstrated that gastric administration of CLA during the  
71 pregestational and gestational periods did not affect ovarian follicle endowment and  
72 mobilization, or did it affect oocyte lipid accumulation, demonstrating that this supplement can  
73 be used to take advantage of the benefits described in the literature without detrimental effects  
74 on female reproductive healthy mice [11]. Therefore, the aim of this study was to evaluate the  
75 effects of maternal gastric administration of CLA on the biometric parameters, ovarian  
76 morphophysiology and the fertility of the F1, F2 and F3 progeny in mice.  
77

## 78 **Materials and Methods**

### 79 *Animals, Facilities and Experimental Design*

80 Female (n=30) and male (n=15) mice C57BL/6 were obtained from the Núcleo de Criação de  
81 Animais de Laboratório and maintained in an environment with a controlled temperature of 22  
82  $\pm 2$  °C and with artificial light cycles (12:12 h). The 6 weeks old females were randomly selected  
83 and distributed in three groups: (1) control (n = 10), (2) fish oil (n = 10), and (3) CLA (n = 10),  
84 that daily received by gavage 35  $\mu$ l of phosphate buffer saline (PBS), fish oil (Mundo dos  
85 Óleos<sup>®</sup>, Brasilia, DF, Brazil), synthetic CLA (Tonalin TG80 Basf<sup>®</sup>, São Paulo, SP, Brazil; 80%  
86 C18:2 conjugated, 39.2% C18:2 *cis*-9, *trans*-11 and 38.4% C18:2 *trans*-10, *cis*-12), respectively.  
87 The fish oil administration was used as a positive control, once the structural and functional  
88 similarities [12] with the fatty acid CLA profile is well established, and also there is a report  
89 about its effects on ovulation rate, and litter size in mice [13]. Treatments were performed  
90 during 50 days (before mating, mating and pregnancy) [11]. These females were crossbred with  
91 10 weeks old untreated males (1:2, male:female) with proven fertility for a period of 2 weeks.  
92 Pups from the parental generation was called the F1 generation. F1 females were mated with  
93 untreated male mice at 6 weeks old to produce the F2 generation. F2 females were mated with  
94 untreated male mice at 6 weeks old to produce the F3 generation. After parturition, females  
95 were euthanized by CO<sub>2</sub> asphyxia and their ovaries were collected. All experiments were  
96 conducted according to the principles and procedures described by the Brazilian National Board  
97 of Animal Experimentation Control (CONCEA) and were approved by the Institutional Ethics  
98 Committee of the Federal University of São João del-Rei (Protocol 013/2018).

### 99 *Biometric data*

100 The animals were weighed weekly on a commercial scale (SF-400<sup>®</sup>, São Paulo, SP, Brazil),  
101 and nasoanal length also was measured. The Lee index (obesity indicator) was calculated as  
102 previously described by [14]. The anogenital length was measured at the 2nd day old, calculated  
103 according to the formula proposed by Whelsh [15], considering IAG=DAG/weight (mm/kg).

104 *Ovarian follicular quantification*

105 All ovaries were fixed in PFA (Sigma-Aldrich, St. Louis, MO, USA) solution. Paraffin-  
106 embedded ovaries were serially sectioned (5  $\mu$ m) and stained with hematoxylin and eosin  
107 solution. In every fifty sections, the number of primordial, primary, secondary, antral, and  
108 atretic follicles were quantified, estimating the total number of follicles per ovary. Follicles  
109 were classified and counted [16] and follicles (from primordial to antral) showing  
110 morphological signs of death such as pyknosis, cellular fragmentation, and disintegration were  
111 classified as atretic [16]. Only follicles containing an oocyte with a visible nucleus were  
112 considered to avoid double-counting. Results are shown as the number of counted follicles per  
113 animal. Atresia rate (%) was determined as the number of atretic follicles/total number of  
114 follicles\*100; and activation rate (%) as the number of growing follicles/ total number of  
115 follicles\*100 [16].

116 *Morphometric evaluation*

117 Follicle diameters were calculated from the average of two perpendiculars, using the image  
118 analysis program Software ImageJ (NIH, USA). The follicle boundary was defined with the  
119 basement membrane clearly visible, as a demarcation between the granulosa cells and a special  
120 theca, and the oocyte boundary was the zona pellucida. Thirty follicles of the class (primary,  
121 secondary and antral) were randomly selected for treatments. Only follicles completely free of  
122 any signs of atresia were analyzed.

123 *Oocyte Lipid Quantification*

124 Paraffin-embedded ovaries were also serially sectioned (5  $\mu$ m) and stained with Sudan red dye,  
125 as described by Sudano [17]. The Sudan red dye solution was prepared with 3% Sudan IV in  
126 70% ethanol. To estimate the relative amount of lipid droplets per oocyte, images of antral  
127 follicles (12 oocytes per animal; 6 animals per group) were captured in 40X objectives. All  
128 photos were converted to black and white (32 bit), and the oocytes included in antral follicles

129 were delimited and analyzed using the area of integrated density compared. This evaluation  
130 was performed in the Image J<sup>®</sup> software according to Leite [18].

### 131 *Statistical analysis*

132 Statistical analysis was carried out using statistical software (GraphPad Prism 8.0, Graph Prism  
133 Inc., San Diego, CA). A completely randomized design (DIC) was carried out with the  
134 following mathematical model:

$$135 \quad Y_{ij} = \mu + x_i + e_{ij}$$

136 Where,

137  $Y_{ij}$  = Bodyweight, nasoanal length, Lee index, primordial, primary, secondary, antral, total and  
138 atretic follicles, atresia and activation rate

139  $\mu$  = Constant

140  $x_i$  = Supplementation (Control, fish oil, CLA)

141  $e_{ij}$  = Random error

142 For the characteristics bodyweight, nasoanal length and Lee index, an intercepts and slope  
143 comparison of the line was performed by means of a simple linear regression analysis during  
144 the 4 weeks of evaluation. For the variables number of primordial, primary, secondary, antral,  
145 total and atretic follicles, atresia and activation rate a D'Agostino & Pearson normality test was  
146 conducted to test the null hypothesis that the data are sampled from a Gaussian distribution.  
147 When the data did not deviate from Gaussian distribution ( $P > 0.05$ ) they were analyzed using  
148 the one-way ANOVA with Newman-keuls test for multiple comparisons. Otherwise, a Kruskal-  
149 Wallis test was done with a Dunn's test for multiple comparisons. A Student t-test was applied  
150 to Body Weight, NA and Lee Index in two-group comparisons. All tests were performed at a  
151 level of significance of 0.05.

152 **Results**

153 Table 1. Effects of prenatal exposure to control, fish oil and CLA on body weight, measured in  
 154 milligrams, in the F1 and F2 generations of female mice.

| Time point         | Treatments | Generation  |    |            |    |
|--------------------|------------|-------------|----|------------|----|
|                    |            | F1          |    | F2         |    |
| 5 Weeks Post-Natal | Control    | 15.36 ± 1.5 |    | 15.8 ± 1.9 | ab |
|                    | Fish Oil   | 15.3 ± 1.8  |    | 17.5 ± 0.5 | a  |
|                    | CLA        | 16.4 ± 1.4  |    | 12.0 ± 2.5 | b  |
| 6 Weeks Post-Natal | Control    | 16.4 ± 1.3  | a  | 17.4 ± 2.8 | ab |
|                    | Fish Oil   | 16.6 ± 1.6  | a  | 20.0 ± 1.6 | a  |
|                    | CLA        | 17.8 ± 0.9  | b  | 14.3 ± 2.4 | b  |
| 7 Weeks Post-Natal | Control    | 17.9 ± 1.8  | ab | 19.6 ± 3.2 | ab |
|                    | Fish Oil   | 17.3 ± 1.8  | a  | 20.5 ± 1.7 | a  |
|                    | CLA        | 19.3 ± 1.9  | b  | 15.4 ± 2.8 | b  |
| 8 Weeks Post-Natal | Control    | 19.7 ± 1.9  |    | 24.8 ± 2.8 | ab |
|                    | Fish Oil   | 18.9 ± 1.3  |    | 20.0 ± 1.0 | a  |
|                    | CLA        | 20.7 ± 2.4  |    | 16.5 ± 2.3 | b  |

155 Table represent means ± standard error of the mean. P ≤ 0.05 (significant difference compared  
 156 to the control)

157 In the F1 generation, the treatments did not affect body weight in the first week of post-weaning  
 158 evaluation, however, a difference was observed in the second and third weeks (P=0.0187 and  
 159 P=0.0245, respectively) in which the weight of animals in CLA treatment increased in

160 comparison to the others, stabilizing in the fourth week (Table 1). In F2 generation, exposure  
 161 of the animals to CLA showed similar results to those in the control over the four weeks of  
 162 evaluation (P=0.0005, P=0.0034, P=0.0212 and P=0.0561, respectively) (Table 1).

163 Table 2. Effects of prenatal exposure to control, fish oil and CLA on Lee index in the F1 and  
 164 F2 generations of female mice.

| Time point         | Treatments | Generation   |              |
|--------------------|------------|--------------|--------------|
|                    |            | F1           | F2           |
| 5 Weeks Post-Natal | Control    | 331.8 ± 18.0 | 335.4 ± 21.5 |
|                    | Fish Oil   | 322.6 ± 21.6 | 319.7 ± 11.8 |
|                    | CLA        | 318.3 ± 16.5 | 320.9 ± 32.2 |
| 6 Weeks Post-Natal | Control    | 313.2 ± 18.0 | 331.6 ± 15.1 |
|                    | Fish Oil   | 302.0 ± 15.5 | 328.9 ± 8.2  |
|                    | CLA        | 294.4 ± 11.4 | 306.5 ± 15.4 |
| 7 Weeks Post-Natal | Control    | 309.4 ± 12.8 | 307.0 ± 20.6 |
|                    | Fish Oil   | 302.3 ± 14.5 | 304.5 ± 15.1 |
|                    | CLA        | 300.5 ± 14.4 | 299.5 ± 17.6 |
| 8 Weeks Post-Natal | Control    | 312.6 ± 9.9  | 320.7 ± 12.8 |
|                    | Fish Oil   | 309.7 ± 11.2 | 307.8 ± 15.3 |
|                    | CLA        | 306.2 ± 14.7 | 301.6 ± 23.6 |

165 Table represent means ± standard error of the mean P ≤ 0.05 (significant difference compared  
 166 to the control).



167

168 A reduction in the Lee Index was observed in both generations in the second week of post-  
169 weaning evaluation ( $P=0.0100$  and  $P=0.0078$ , respectively) of CLA-treated animals (Table 2).

Table 3. Effects of prenatal exposure to control, fish oil and CLA on anogenital index in the F1 and F2 generations of female mice.

| Treatments | Generation    |                |                            |                             |                            |                             |
|------------|---------------|----------------|----------------------------|-----------------------------|----------------------------|-----------------------------|
|            | F1            |                | F2                         |                             | F3                         |                             |
|            | Female        | Male           | Female                     | Male                        | Female                     | Male                        |
| Control    | 613.4 ± 54.8  | 1114.0 ± 201.2 | 588.7 ± 100.9 <sup>a</sup> | 971.3 ± 136.0 <sup>a</sup>  | 488.9 ± 66.4 <sup>a</sup>  | 850.0 ± 54.2 <sup>a</sup>   |
| Fish Oil   | 516.8 ± 84.4  | 968.8 ± 175.1  | 560.8 ± 94.44 <sup>a</sup> | 965.0 ± 171.7 <sup>a</sup>  | 519.0 ± 79.0 <sup>a</sup>  | 1151.0 ± 71.94 <sup>b</sup> |
| CLA        | 618.7 ± 136.5 | 1010.0 ± 165.4 | 690.7 ± 139.5 <sup>b</sup> | 1130.0 ± 134.6 <sup>b</sup> | 578.8 ± 119.5 <sup>b</sup> | 1037.0 ± 106.0 <sup>c</sup> |

Table represent means ± standard error of the mean  $P \leq 0.05$  (significant difference compared to the control)

In the F1 generation, the treatments did not affect the anogenital index in males or females ( $P>0.05$ ) (Table 3). However, the F2 generation showed an increase in the anogenital index in both sexes of CLA-treated animals ( $P=0.0114$  and  $P<0.0001$ , female and male respectively) (Table 3). and the male offspring of the F2 generation (F3 puppies) showed differences compared to the control and fish oil groups ( $P<0.0001$ ) (Table 3).

Regarding morpho-quantitative analyses, there was no difference ( $P>0.05$ ) in the number of primordial, primary, secondary, antral, atretic, and total follicles per ovary in control, fish oil, and CLA-treated animals in the F1 and F2 generations (Fig 1 and 2).

Fig 1. (a) Primordial, primary, secondary and antral follicles, (b) total follicles and (c) atretic follicles of ovaries from control, fish and CLA of F1 generation. These parameters were not altered by treatment ( $P>0.05$ ).

Fig 2. (a) Primordial, primary, secondary and antral follicles, (b) total follicles and (c) atretic follicles of ovaries from control, fish and CLA of F2 generation. These parameters were not altered by treatment ( $P>0.05$ ).

All classes of follicles were observed qualitatively observed in the ovaries of control, fish oil, and CLA treated animals and no morphological alterations resulted from these treatments over two generations (Fig 3), as the follicle and oocyte diameter were not altered ( $P>0.05$ ), nor was the oocyte:follicle ratio ( $P>0.05$ ).

Fig 3. Morphometry of primary, secondary and antral follicles from control, fish oil and CLA groups. (a) Diameter of the oocyte; (b) follicle (c) oocyte:follicle diameter ratio of F1 generation, (d) diameter of the oocyte; (e) follicle and (f) oocyte:follicle diameter ratio of F2 generation. These parameters were not altered by treatment ( $P>0.05$ ).

Additionally, an increase in the amount of lipid droplets, measured by Sudan IV staining, was observed in F1 animals from the CLA group compared to the fish oil group ( $P=0.0446$ ) (Fig 4A). The F2 generation showed no difference in this parameter ( $P>0.05$ ) (Fig 4B).

Fig 4. Integrated density of lipid content (arbitrary units) of oocytes included in antral follicles among control, fish oil, and CLA groups for F1 (a) and F2 (b) generation.

## Discussion

Organogenesis and tissue differentiation occur during the prenatal period, considered a critical moment for the programming of the offspring's phenotype, which can impact on the postnatal period, persisting into the offspring's adult life [19]. Studies carried out in rodents demonstrated the nutritional effects on GnRH production and secretion, which can affect female puberty [20]. CLA supplementation has demonstrated some beneficial effects, such as the regulation of adipogenesis and myogenesis and alteration of body composition [21], as well as immunological, cardiovascular and anticarcinogenic activities [22, 10]. However, few studies have evaluated the reproductive parameters of the offspring of CLA-treated females [13]. Thus, our data demonstrated that the use of CLA through gastric administration in the parental generation did not affect the obesity rates and follicular mobilization in later generations, affirming the absence of side effects of gastric CLA administration on offspring.

The current study demonstrated that animals born to mothers supplemented with CLA did not show alterations in body weight and the obesity index, as previously reported for parental [11] and corroborating the literature [23]. Some studies evaluated weight gain in CLA-treated animals and reported similar findings. According to Peng [24], the *trans*-10,*cis*-12 isomer can pass through the umbilical cord from mothers to their progeny. Thus, the anti-obesity effects can be long-lasting. Studies carried out in dairy cows showed that the inclusion of CLA in the diet did not affect food consumption [25, 26], which may be lower in the maintenance of the animals weight throughout the life cycle time. Although the potential of CLA to AID in weight

loss is publicized, Vaisar et al. [27] and Gaullier et al. [28] indicate that in healthy individuals, this loss is less pronounced than in those who already have obesity.

In mammals, the puberty onset is a physiological process marked by increased levels of steroid hormones, during which animal and humans attain the characteristics of an adults, such as through sexual maturation and the development of reproductive and neurological organs [29]. Although such events are genetically determined, several factors can alter the outcome, such as nutritional and metabolic status, as well as environmental factors [30]. For the beginning of this process, the secretion of GnRH by the hypothalamus, which stimulates sex hormones through the pituitary and gametogenesis, is necessary, but the trigger for this stage of development has not yet been fully elucidated [29].

The sexually dysmorphic anogenital index in rodents is considered a broad biomarker of androgen exposure during the fetal masculinization programming window and predictor of late reproductive disorders in offspring [31, 32], however, the reflex of androgen action occurs within a reduced time interval in rats (days 15.5 to 18.5) [33]. The observed effect of CLA on the increase in the anogenital index in male and female mice can be attributed to the possible effect of this supplementation acting on the increase in the production of steroid hormones and may also be due to the exposure to androgens. Studies have demonstrated that neonatal exposure to androgens in women results in virilization by this exogenous pathway, both before and during the masculinization programming window [34]. This index in females, as shown in studies by Mendiola et al. [35] suggests that the androgenic environment during the prenatal phase may indicate an increase in the number of ovarian follicles and high levels of testosterone. However, our findings do not show variations in the number of follicles in the treatments evaluated.

In females, a greater anogenital distance can lead to a hyperandrogenic uterine environment, which may be associated with prenatal ovarian dysfunction [34]. While its shortening in males

was associated with worse semen quality and the possibility of infertility [34]. Thus, it is possible that CLA has androgenic effects that lead to differences in the anogenital distance between males and females from generations that were exposed to CLA during fetal development. According to Bach [36], unsaturated fatty acids are direct substrates for the cholesterol production and, consequently, of steroid hormones, with an increase in the progesterone production, which is related to increased fertility and embryonic development [37].

Freitas et al. [11] found no effect on mobilization and follicular morphology, similarly to the present study. Campos-Junior et al. [16] state that several factors can act on these parameters: the inclusion of fat in the diet has been reported to increase follicle number and diameter [38, 39]. Moreover studies claim that the content of fatty acids in the follicular and oocyte fluid influences the development competence [40]. Broughton et al. [41] observed that the consumption of CLA did not influence the ovulation rate or the production of prostaglandins, inferring the difficulty of predicting the change through the inclusion of fatty acids. Csilik et al. [38] determined through studies with dairy cows that the best time to administer CLA is before calving, in which its accumulation would be advantageous to facing metabolic challenges. Our findings corroborates those of Yi et al. [13], who demonstrated that CLA supplementation did not affect the ovulation rate in mice.

Oocytes can accommodate large amounts of lipid droplets, and their absorption in the embryos is critical, being the main factor responsible for the accumulation of ATP through mitochondrial oxidation [42]. Abazarikia et al. [43] state that the inclusion of CLA in oocyte maturation and in vitro embryo culture can affect the modulation of lipogenesis. The data in the current study corroborate those of Freitas et al. [11], as supplementation of the maternal diet CLA, did not alter the lipid content of oocytes included in antral follicles.

In conclusion, our study showed for the first time in the literature that gastric CLA administration during the pregestational and gestational periods did not affect ovarian follicle

endowment and mobilization in the F1 and F2 progeny. However, some punctual alterations in the anogenital and Lee indexes, as well as inbody weight, resulted from this treatment. Therefore, these findings indicate that CLA supplementation does not have a significant adverse effect on the parameters evaluated herein and can be used without apparent detrimental effects on female reproductive health on mice, taking advantage of the other benefits already described in the literature.

### **Acknowledgements**

This work was supported by the National Council for Scientific and Technological Development (CNPq, Brazil) and Minas Gerais State Research Foundation (FAPEMIG, Brazil). DFS, GAGL and BAM received a scholarship from CNPq and CAPES.

### **Funding**

This work was supported by the National Council for Scientific and Technological Development (CNPq, Brazil) and Minas Gerais State Research Foundation (FAPEMIG, Brazil). DFS, GAGL, BNR and BAM received a scholarship from CNPq and CAPES.

### **Author Contributions Statement**

PHACJ designed and supervised the experiments. DSF, GAGL and BRN performed and analyzed experiments and prepared the manuscript. APM and GAGL contributed to the statistical analysis of experimental findings. All authors participated in the discussion of data, and revised the final manuscript.

### **Conflict of interest Statement**

The authors declare that there are no known conflicts of interest associated with this publication and there has been no significant financial support for this work that could have influenced its outcome.

## References

1. Funston RN, Martin JL, Adams DC, Larson EDM. Effects of winter grazing system and supplementation during late gestation on performance of beef cows and progeny. *Western Section, American Soc of Ani Sci.* 2008, 59, 102-105. doi: 10.2527/jas.2008-1323.
2. Langley-Evans SC. Developmental programming of health and disease. *Proc Nutr Soc.* 2006; 65(1):97-105. doi: 10.1079/pns2005478.
3. Barker MJ, Greenwood KM, Jackson M, Crowe S. Persistence of cognitive effects after withdrawal from long-term benzodiazepine use: a meta-analysis. *Arch Clin Neuropsychol.* 2004; 19, 437-54. doi: 10.1016/S0887-6177(03)00096-9.
4. Klein JL, Martinho S, Adams DCAF, Brondani IL, Pizutti LAD, Antunes DP, Poletto V, Karsten MS, Bem PHT, Mello DAS. Fetal programming and the consequences on progeny development - a review. *Res Soc and Develop.* 2021; 10, 12. doi: 10.33448/rsd-v10i12.20766.
5. Reynolds C, Vickers M, Harrison C, Segovia AS, Gray C. High fat and/or high salt intake during pregnancy alters maternal meta-inflammation and offspring growth and metabolic profiles. *Physiol Rep.* 2014, 12399. doi: 10.14814/phy2.12110.
6. Maamar BM, King SE, Nilsson E, Beck D, Skinner MK. Epigenetic transgenerational inheritance of parent-of-origin allelic transmission of outcross pathology and sperm epimutations. *Dev Biol.* 2020, 458, 106–119. doi: 10.1016/j.ydbio.2019.10.030.
7. Ideraabdullah FY, Steven L, Zeisel H. Dietary Modulation of the Epigenome. *Physiol Ver.* 2018, 1, 667-695. doi: 10.1152/physrev.00010.2017.



8. Guerrero-Bosagna C. Environmental signaling and evolutionary change: can exposure of pregnant mammals to environmental estrogens lead to epigenetically induced evolutionary changes in embryos? *Evol Dev.* 2005, 341-350. doi: 10.1111/j.1525-142X.2005.05033.x.
9. McCarrey J. Distinctions between transgenerational and non-transgenerational epimutations. *Mol Cell Endocrinol.* 2014, 398, 13-23. doi: 10.1016/j.mce.2014.07.016.
10. Freitas DS, Lopes GAG, Nascimento BR, Pereira LC, Batista RI, Campos-Junior PHA. Ácido linoleico conjugado como potencial bioativo para modulação e criotolerância de gametas e embriões. *Cienc Anim Bras.* 2020, 21. doi: 10.1590/1809-6891v21e-63574.
11. Freitas DS, Lopes GAG, Nascimento BR, Magalhães BA, Madureira AP, Campos-Junior, PHA. Effects of cis-9, trans-11 and trans-10, cis-12 conjugated linoleic acid supplementation on maternal reproductive parameters. *Zygote* 2022, 1-9. doi: 10.1017/S0967199422000405.
12. Pires JAA, Grummer RR. Specific fatty acids as metabolic modulators in the dairy cow. *Ver Bras Zoot.* 2008, 37. doi: 10.1590/S1516-35982008001300033.
13. Yi D, Zeng S, Guoa Y. A diet rich in n-3 polyunsaturated fatty acids reduced prostaglandin biosynthesis, ovulation rate, and litter size in mice. *Theriogenology* 2012, 78, 28–38. doi: 10.1016/j.theriogenology.2012.01.013.
14. Bernardis LL. Prediction of carcass fat, water and lean body mass from Lee's "nutritive ratio" in rats with hypothalamic obesity. *Experientia* 1970; 26, 789–790. doi: 10.1007/BF02232553.
15. Welsh M, Saunders PT, Fisker M, Scott HM, Hutchison GR, Smith LB, Sharpe RM. Identification in rats of a programming window for reproductive tract masculinization, disruption of which leads to hypospadias and cryptorchidism. *J Clin Invest.* 2008, 118(4), 1479-90. doi: 10.1172/JCI34241.

16. Campos-Junior PHA, Assunção CM, Batista RIP, Carvalho BC, Viana JHM. Follicular populations, recruitment and atresia in the ovaries of different strains of mice. *Reprod Biol.* 2012, 12, 41-55. doi: 10.1016/s1642-431x(12)60076-x.
17. Sudano MJ, Santos VG, Tata A, Ferreira C, Paschoal DM, Machado R, Landim-Alvarenga FC. Phosphatidylcholine and Sphingomyelin Profiles Vary in *Bos taurus indicus* and *Bos taurus taurus* In Vitro- and In Vivo-Produced Blastocysts. *Biol Reprod.* 2012, 87, 1-11. doi: 1095/biolreprod.112.102897.
18. Leite AC, Andrade VB, Silva EBM, Borges AM. Effect of conjugated linoleic acid addition in vitro culture medium in F1 Holstein X Zebu embryo survival post vitrification. *Arq Bras Med Vet Zootec.* 2017, 69, 1385-1392. doi: 10.1590/1678-4162-9238.
19. Cardoso RC, Puttabyatappa M, Padmanabhan V. Steroidogenic versus metabolic programming of reproductive neuroendocrine, Ovarian and Metabolic Dysfunctions. *Neuroendocrinology* 2015, 102, 226–37. doi: 10.1159/000381830.
20. Iwasa T, Matsuzaki T, Murakami M, Kinouchi R. Delayed puberty in prenatally glucocorticoid administered female rats occurs independently of the hypothalamic Kiss1–Kiss1r–GnRH. *International journal of developmental neuroscience: the official journal of the International Society for developmental Neuroscience* 2010, 292, 183-188. doi: 10.1016/j.ijdevneu.2010.11.001.
21. Poulos SP, Sisk M, Hausman D, Azain MJ, Hausman GJ. Pre- and Postnatal Dietary Conjugated Linoleic Acid Alters Adipose Development, Body Weight Gain and Body Composition in Sprague-Dawley Rats. *Nutr Metab.* 2001. doi: 10.1093/jn/131.10.2722.
22. Basak S, Duttaroy AK. Conjugated Linoleic Acid and Its Beneficial Effects in Obesity, Cardiovascular Disease, and Cancer. *Nutrients* 2020; 12, 1913. doi: 10.3390/nu12071913.

23. Yeganeh A, Zahradka P, Taylor CG. Trans-10,cis-12 conjugated linoleic acid (t10- c12 CLA) treatment and caloric restriction differentially affect adipocyte cell turnover in obese and lean mice. *J Nutr Biochem*. 2017, 49, 123–32. doi: 10.1016/j.jnutbio.2017.08.003.
24. Peng Y, Ren F, Yin JD, Fang, Q, Li, F, Li DF. Transfer of conjugated linoleic acid from sows to their offspring and its impact on the fatty acid profiles of plasma, muscle, and subcutaneous fat in piglets. *J Anim Sci*. 2010, 88, 1741–175. doi: 10.2527/jas.2009-2354.
25. Bayat AR, Razzaghi M, Sari M, Kairenius P, Tröscher E, Trevisi J, Vilkki L. The effect of dietary rumen-protected *trans*-10,*cis*-12 conjugated linoleic acid or a milk fat-depressing diet on energy metabolism, inflammation, and oxidative stress of dairy cows in early lactation. *J Dairy Sci*. 2022; 105, 3032-3048.
26. Castanheda-Gutierrez E, Benefield BC, Veth MJ, Santos NR, Gilbert RO, Butler WR, Bauman DE. Evaluation of mechanism of action of conjugated linoleic acid isomers on reproduction in dairy cows. *J Dairy Sci*. 2007, 4253–4264. doi: 10.3168/jds.2007-0117.
27. Vaisar T, Wang S, Omer M, Irwin A, Storey C, Tang C, DenHartigh L. 10,12-conjugated linoleic acid supplementation improves HDL composition and function on mice. *J Lipid Res*. 2022, 100241. doi: 10.1016/j.jlr.2022.100241.
28. Gaullier JM, Halse J, Hoye L, Kristiansen K, Fagertun H, Vik H, Gudmundsen O. Conjugated linoleic acid supplementation for 1 year reduces body fat mass in healthy overweight humans. *Am J Clin Nutr*. 2004, 79, 1118-1125. doi: 10.1093/ajcn/79.6.1118.
29. Federici S, Goggia G, Giovanellia L, Cangianoa B, Persania L, Bonomia M, Quintonc R. Pharmacological Induction of Puberty. *Comprehensive Pharmacology* 2022, 75-93. doi: 10.1016/B978-0-12-820472-6.00101-8.

30. Veldhuis J, Alleva JM, Vaate AJ. Me, my selfie, and I: the relations between selfie behaviors, body image, self-objectification, and self-esteem in young women. *Psyc of Popular Media Cult.* 2018. doi: 10.1037/ppm0000206.
31. Dean A, Sharpe RM. Anogenital distance or digit length ratio as measures of fetal androgen exposure: Relationship to male reproductive development and its disorders. *J Clin Endocrinol Metab.* 2013, 98, 2230–2238. doi: 10.1210/jc.2012-4057.
32. Thankamony A, Pasterski V, Hughes A. Anogenital distance as a marker of androgen exposure in humans. *Andrology* 2016. doi: 10.1111/andr.12156.
33. Van den Driesche S, Scott HH, MacLeod DJ, Fiskén M, Walker M, Sharpe RM. Relative importance of prenatal and postnatal androgen action in determining growth of the penis and anogenital distance in the rat before, during and after puberty. *Int J Androl.* 2011, e578-86. doi: 10.1111/j.1365-2605.2011.01175.x.
34. Mira-Escolano MP, Mendiola J, Mínguez-Alarcón L, Melgarejo M, Cutillas-Tolín A, Roca M, López-Espín JJ, Noguera-Velasco JÁ, Torres-Cantero AM. Longer anogenital distance is associated with higher testosterone levels in women: a cross-sectional study. *Int J Obstet Gynaecol.* 2014, 121, 11. doi: 10.1111/1471-0528.12627.
35. Mendiola J, Roca M, Mínguez-Alarcón L, Mira Escolano MP, Lopez-Espin J, Barrett E, Swan S, Torres-Cantero A. Anogenital distance is related to ovarian follicular number in young Spanish women: a cross-sectional study. *Environmental health: a global access science source* 2012, 11. Doi: 10.1186/1476-069X-11-90.
36. Bach A. La reproducción del vacuno lechero: nutrición y fisiología. In: *Curso de Especialización FEDNA.* Purina, 7, España, 2003.

37. Ohajuruka OA, Wu Z, Palmquist DL. Ruminal metabolism, fiber, and protein digestion by lactating cows fed calcium soap or animal-vegetable fat. *J Dairy Sci.* 1991, 74, 2601-2609. doi: 10.3168/jds.s0022-0302(91)78438-5.
38. Csillik Z, Keresztes M, Galamb E, Hammon HM, Troscher A, Fébel H, Kulcsar M, Husvet F, Huszenicza G, Butler WR. Effect of pré and postpartum supplementation with lipid encapsulated conjugated linoleic acid on reproductive performance and the growth hormone insulin-like growth factor-I axis in multiparous high-producing dairy cows. *J Dairy Sci.* 2017, 7, 5888-5898.
39. Lucy MC. Regulation of ovarian follicular function by somatotropin and insulin-like growth factors in cattle. *J Dairy Sci.* 2000, 83, 1635-1647 10908067. doi: 10.3168/jds.S0022-0302(00)75032-6.
40. Childs S, Lynch A, Hennessy C, Whates JM, Reenan MG, Diskin DA, Kenn Y. Effect of dietary enrichment with either n-3 or n-6 fatty acids on systemic metabolite and hormone concentration and ovarian function in heifers. *Animal* 2008, 2, 883-893. doi: 10.1017/S1751731108002115.
41. Broughton KS, Rule DC, Ye Y, Zhang X, Driscoll M, Culver B. Dietary omega-3 fatty acids differentially influence ova release and ovarian cyclooxygenase-1 and cyclooxygenase-2 expression in rats. *Clin Nutr Res.* 2009, 29, 197–205. doi: 10.1016/j.nutres.2009.01.007.
42. Abodia M, De Cosmib V, Parazzini F, Agostoni C. Omega-3 fatty acids dietary intake for oocyte quality in women undergoing assisted reproductive techniques: A systematic review. *Eur J Obstet Gynecol Reprod Biol.* 2022; 275, 97-105. doi: 10.1016/j.ejogrb.2022.06.019.
43. Abazarikia AH, Zhandi M, Shakeri M, Towhid A. In vitro supplementation of trans-10, cis-12 conjugated linoleic acid ameliorated deleterious effect of heat stress on bovine oocyte developmental competence. *Theriogenology* 2020; 142, 296-302. doi: 10.1016/j.theriogenology.2019.10.028.

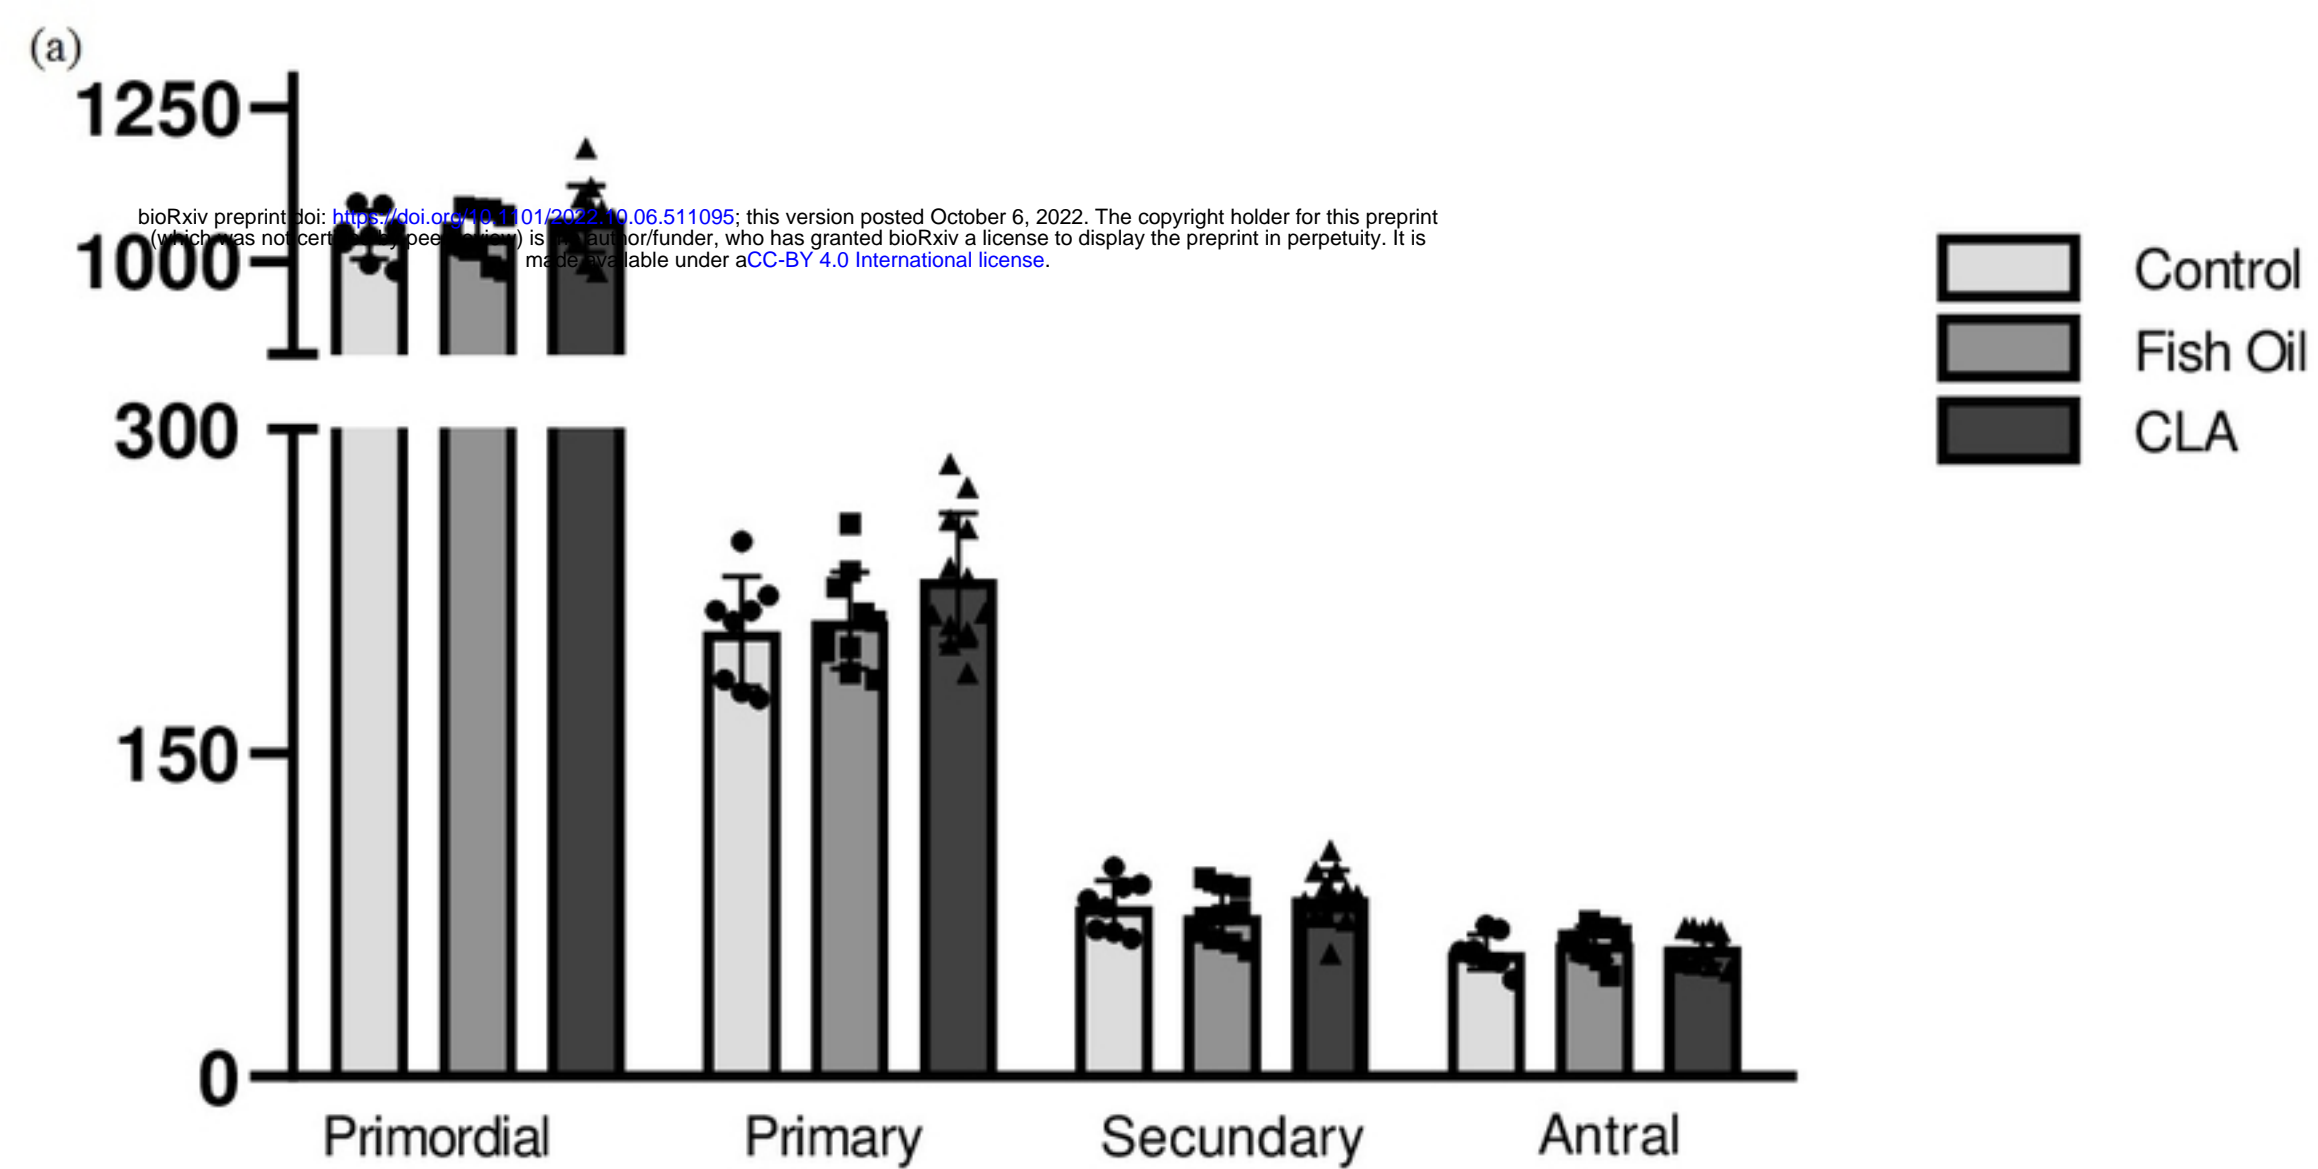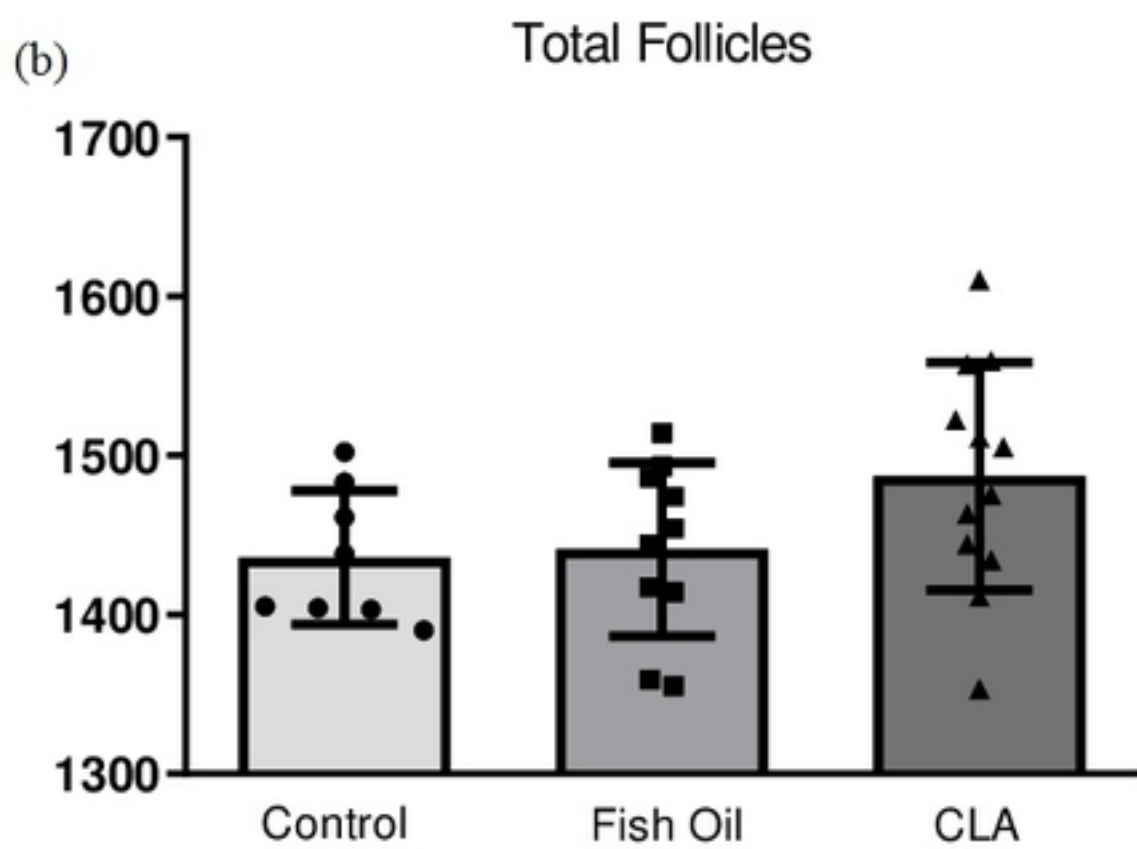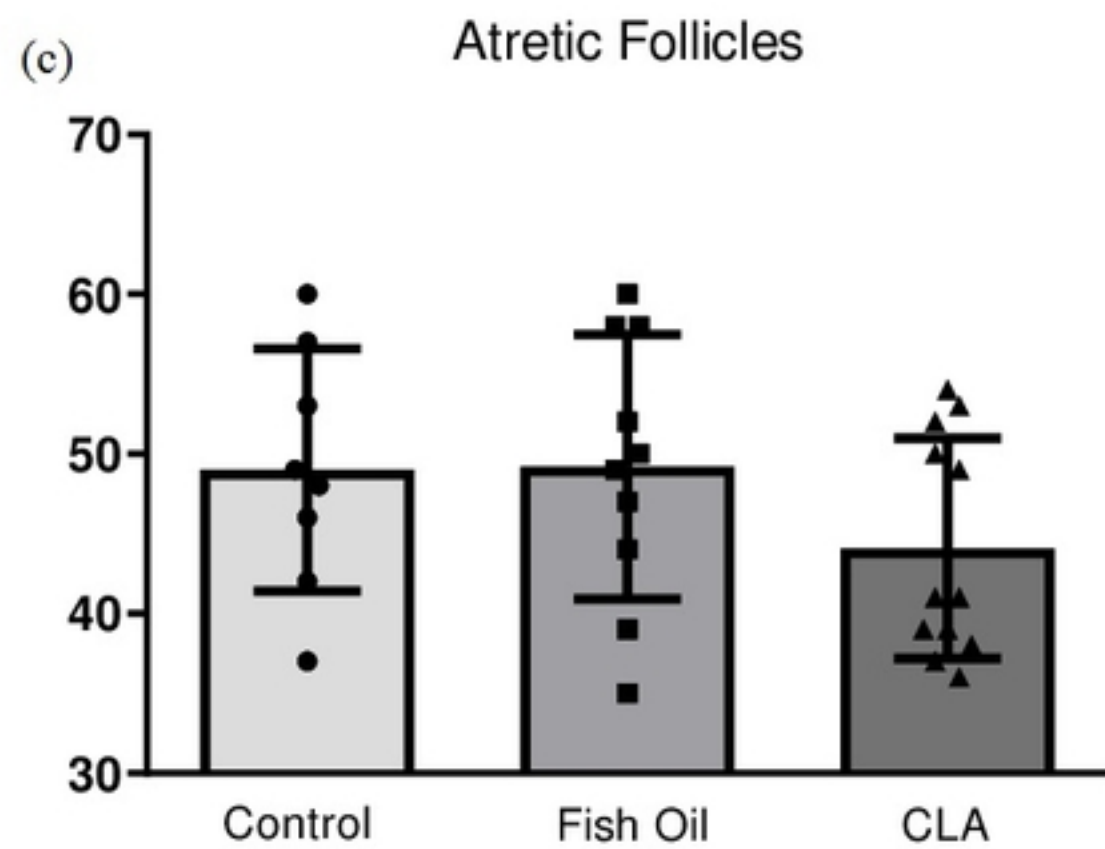

Figure 1

(a) bioRxiv preprint doi: <https://doi.org/10.1101/2022.10.06.511095>; this version posted October 6, 2022. The copyright holder for this preprint (which was not certified by peer review) is the author/funder, who has granted bioRxiv a license to display the preprint in perpetuity. It is made available under aCC-BY 4.0 International license.

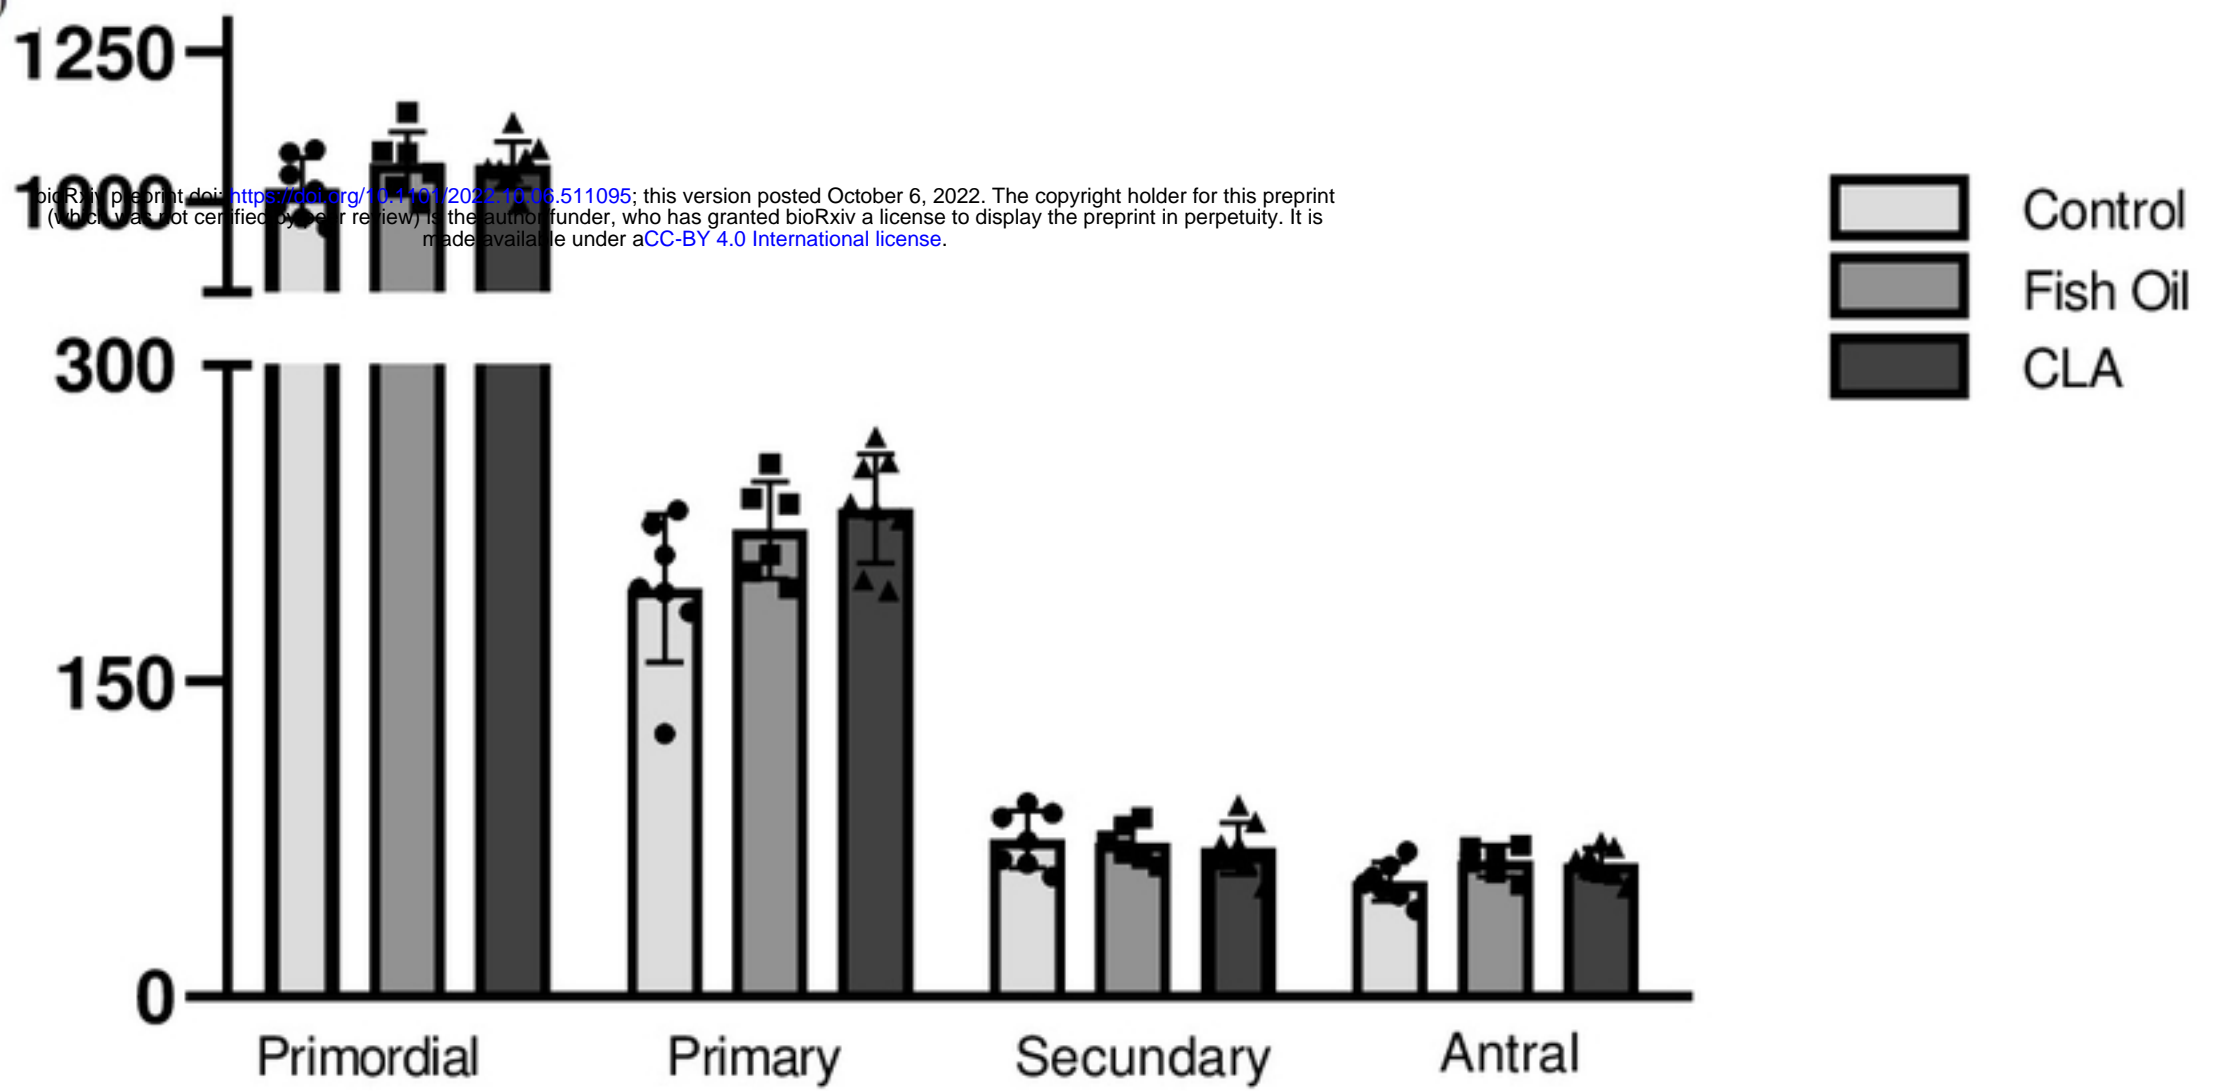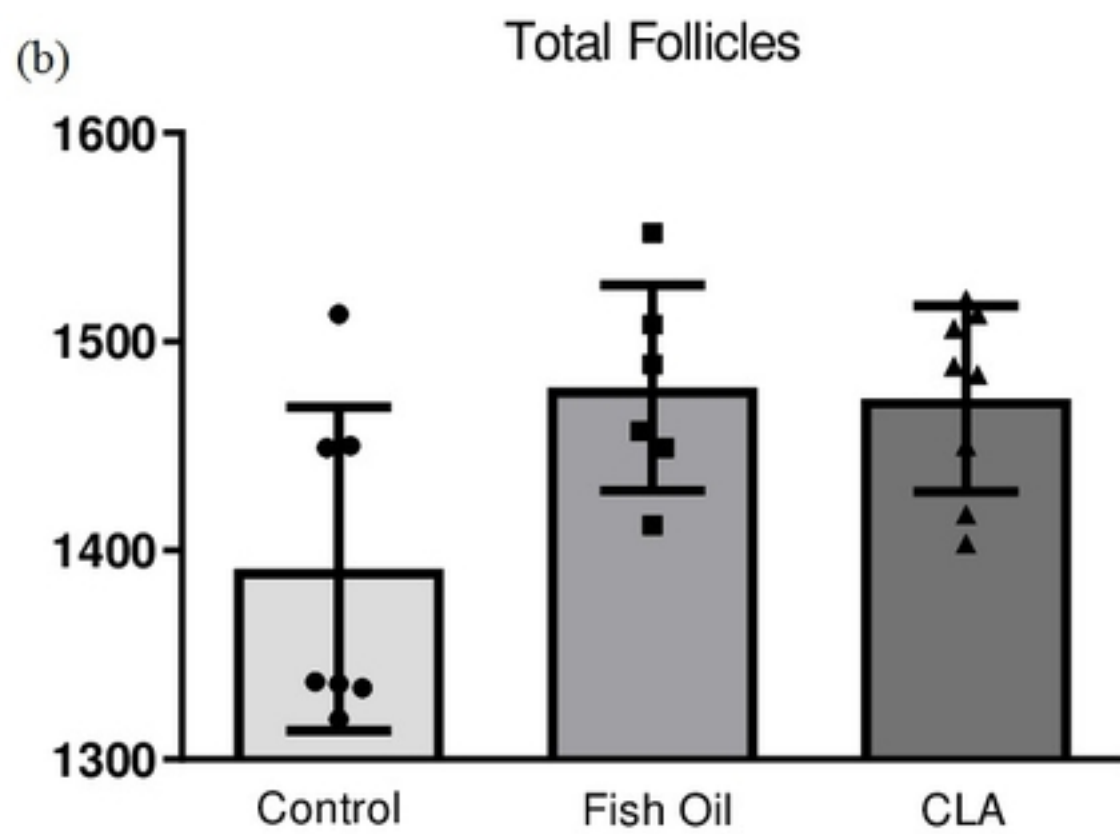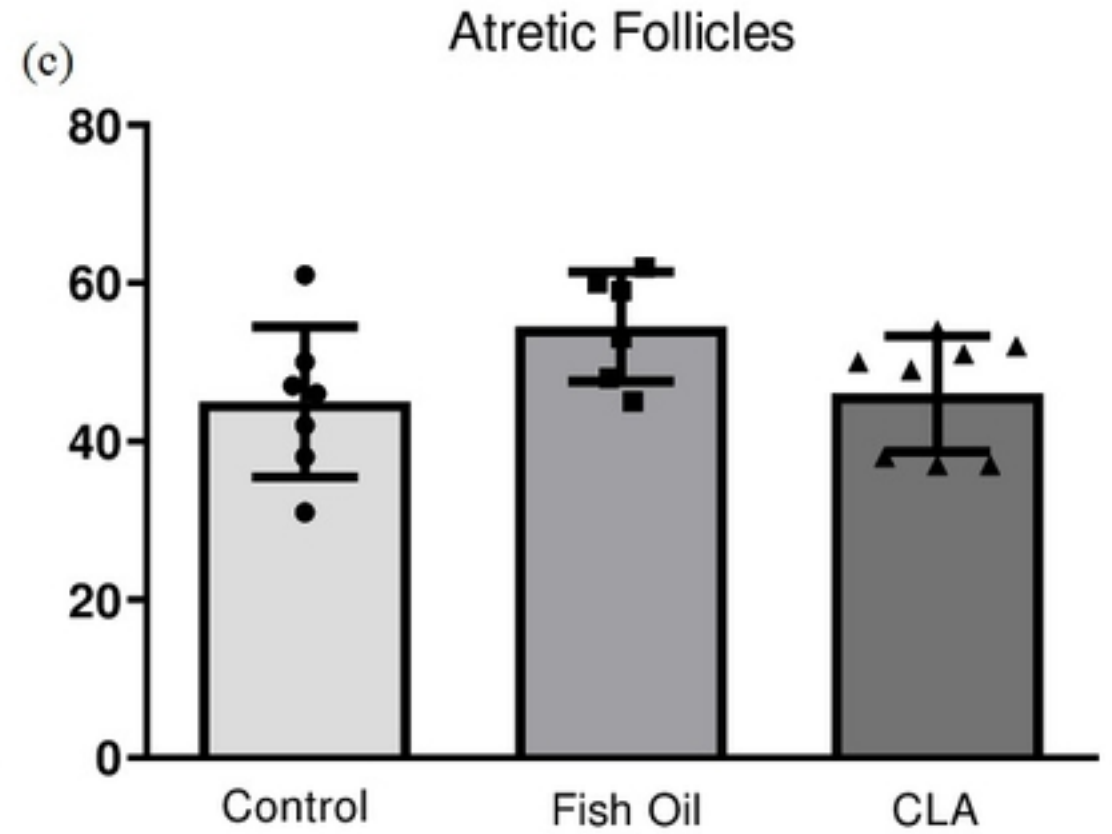

Figure 2

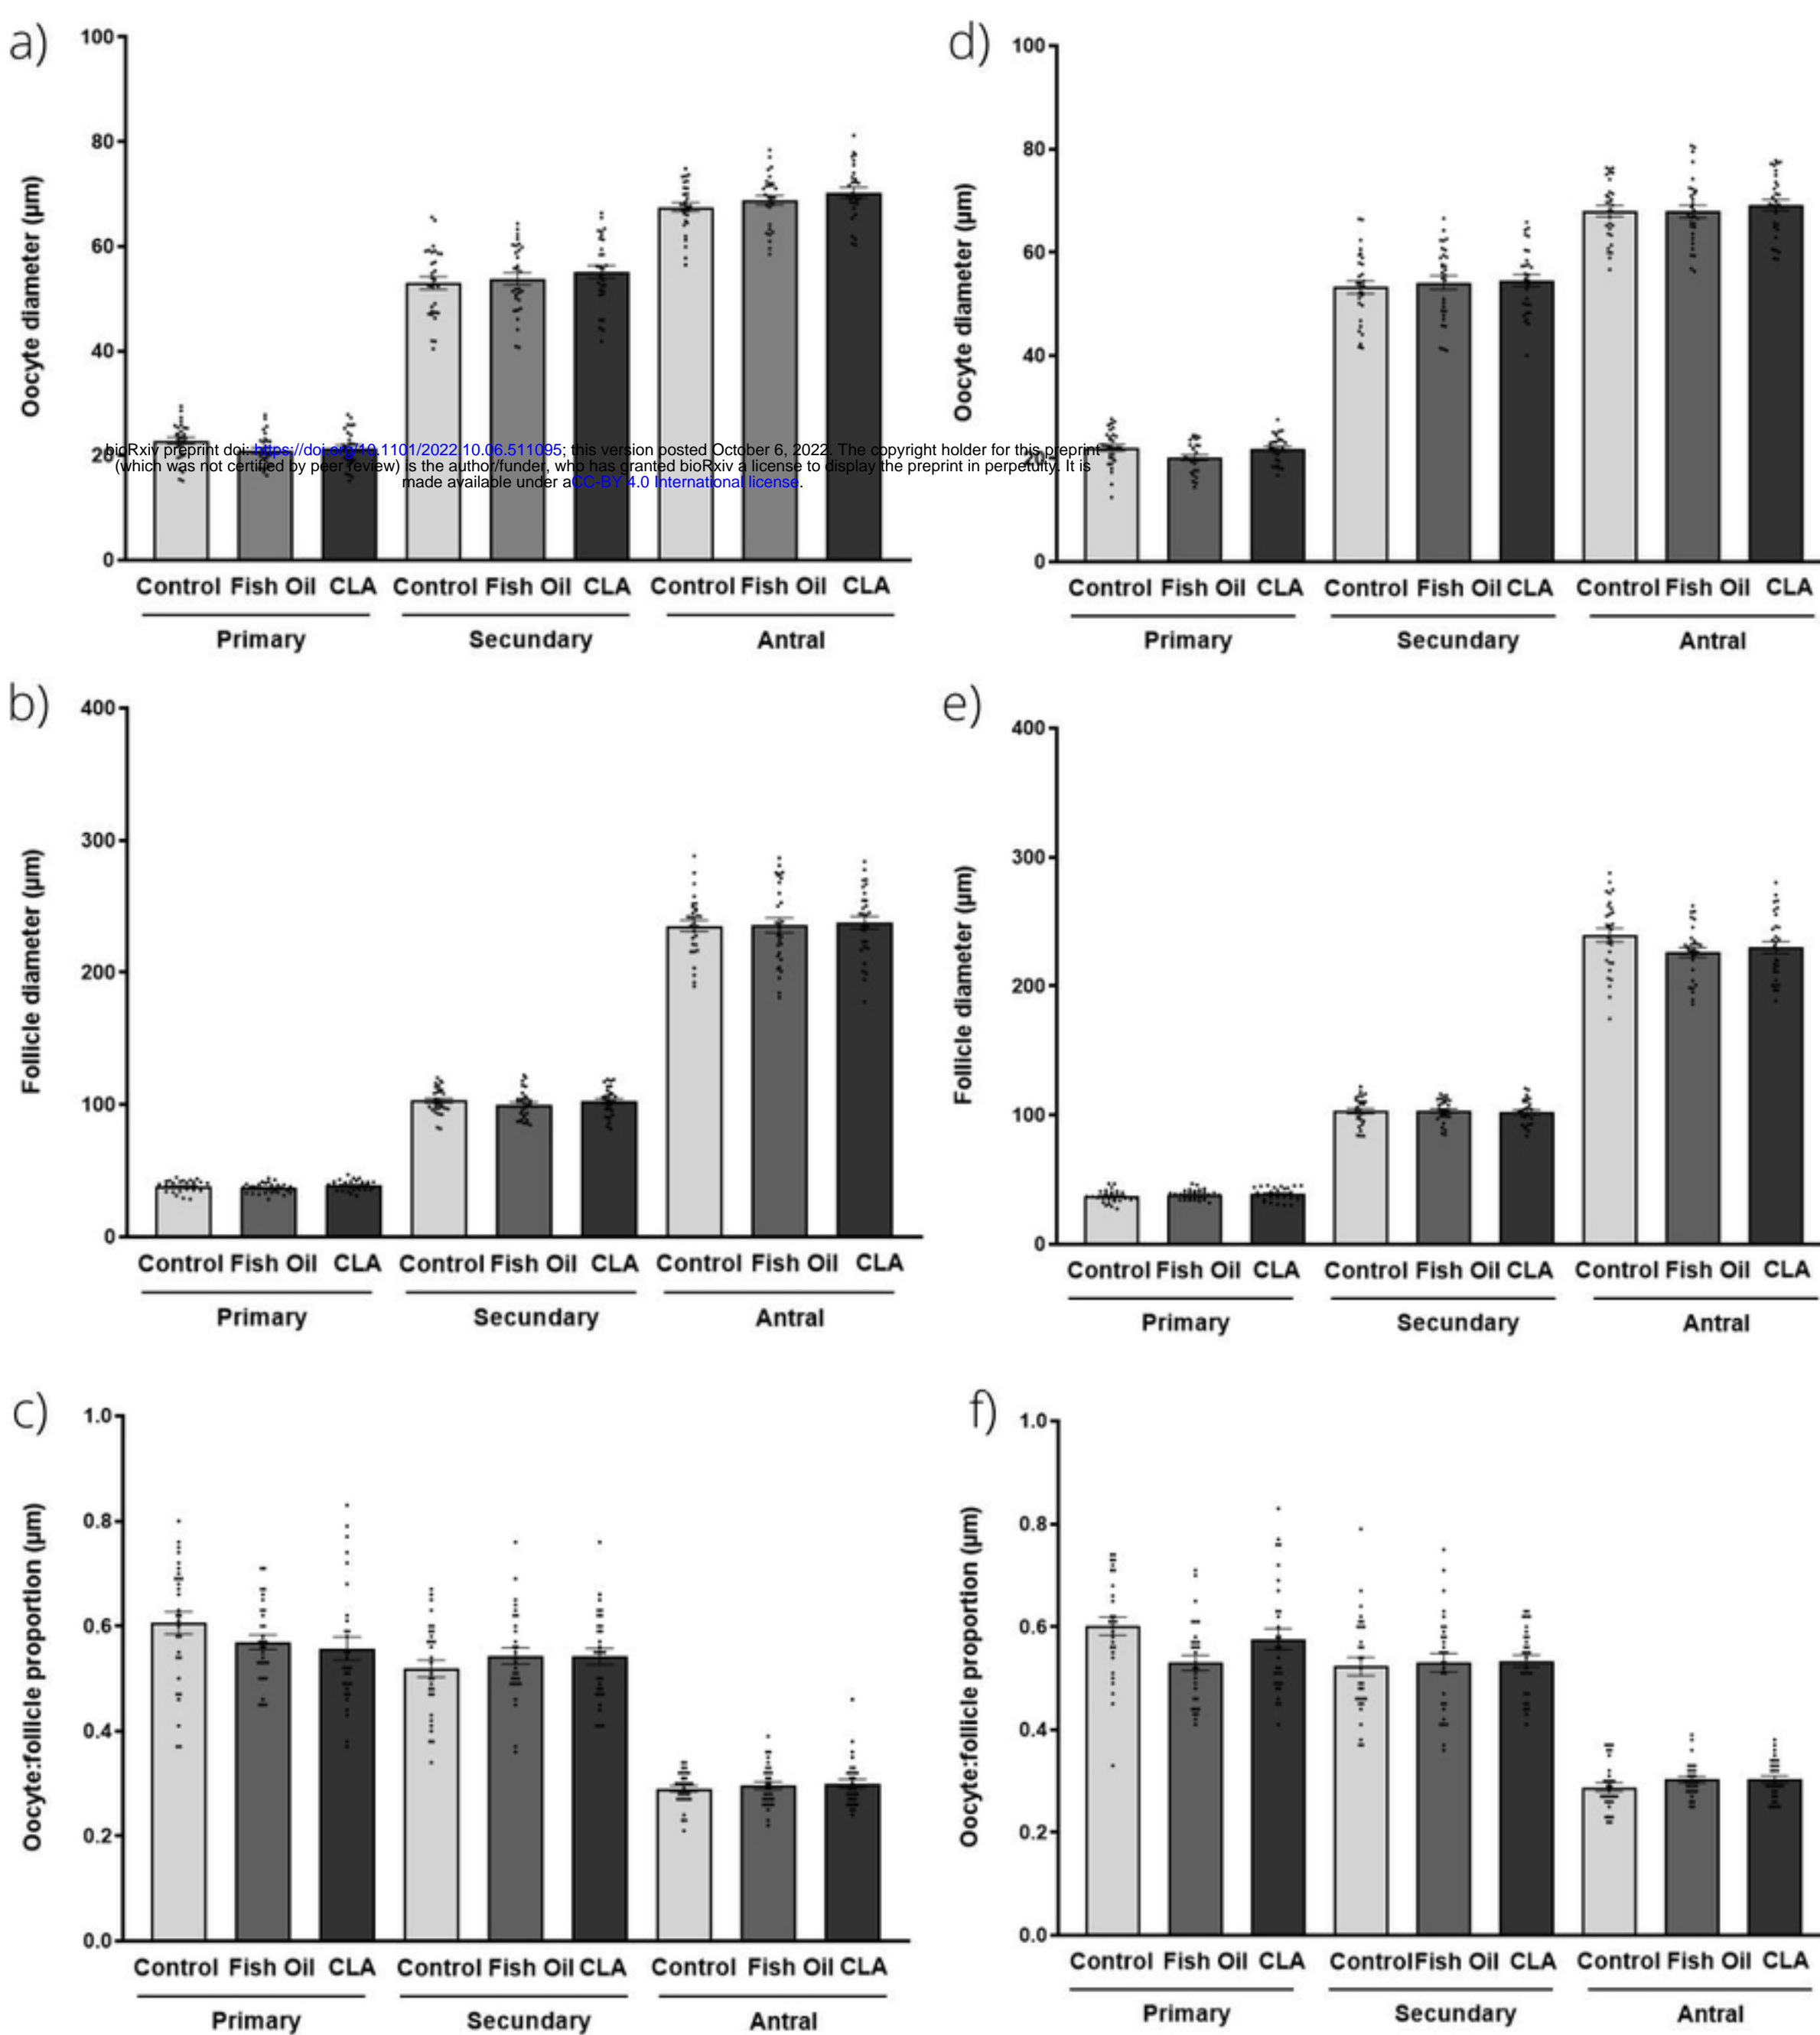

Figure 3



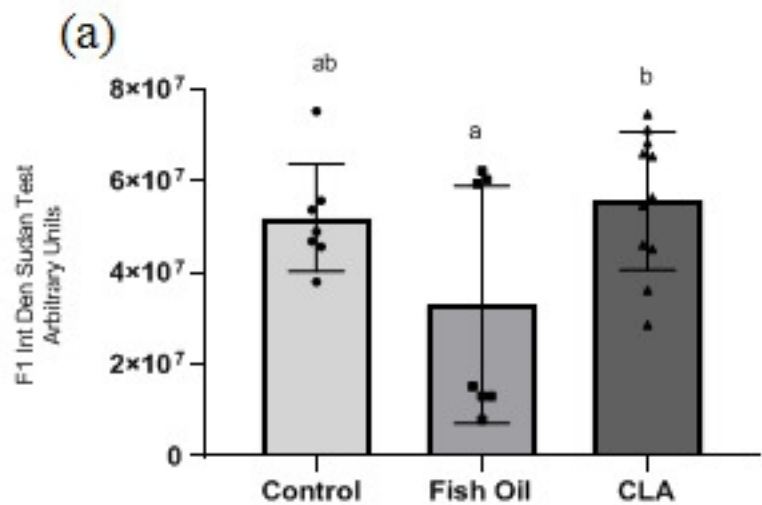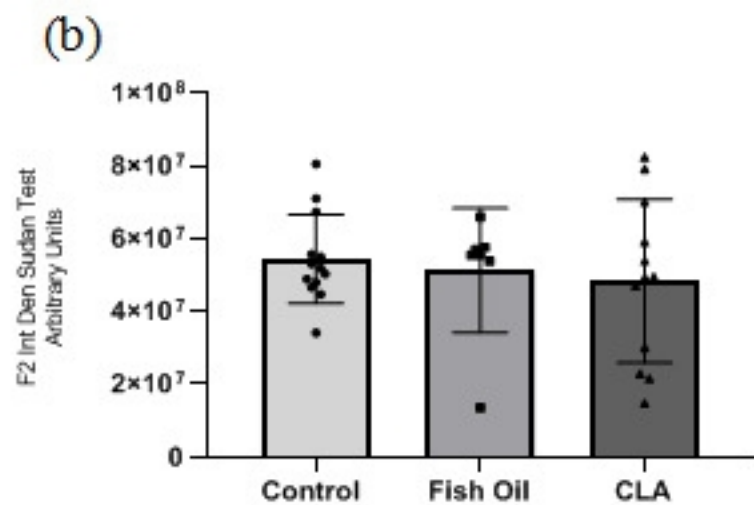

Figure 4
